# Supplementary material for: Lipopolysaccharide O structure of adherent and invasive Escherichia coli regulates intestinal inflammation via complement C3
Source: PLOS journal article supplement (doi:10.1371/journal.ppat.1008928), 2020-10-07

**S7 Fig. C3 depletion and engulfment activity after treatment with CVF, and detailed histological scores shown in Fig. 5.**

(A) Sera were collected from WT mice treated intraperitoneally with 25  $\mu\text{g}/\text{body}$  of cobra venom factor or mock. Serum C3 was determined by immunoblotting. (B) Bone marrow macrophages were incubated with the indicated bacterial strains with or without 5% sera from WT mice treated with 25  $\mu\text{g}/\text{body}$  of cobra venom factor or mock. Internalized bacteria were counted after treatment with gentamicin ( $n=3$ ). (C) Individual parameters of histological scores shown in Fig. 5C. Data represent pooled results from two independent experiments. Error bars represent SEM. \*\*\* $p < .001$

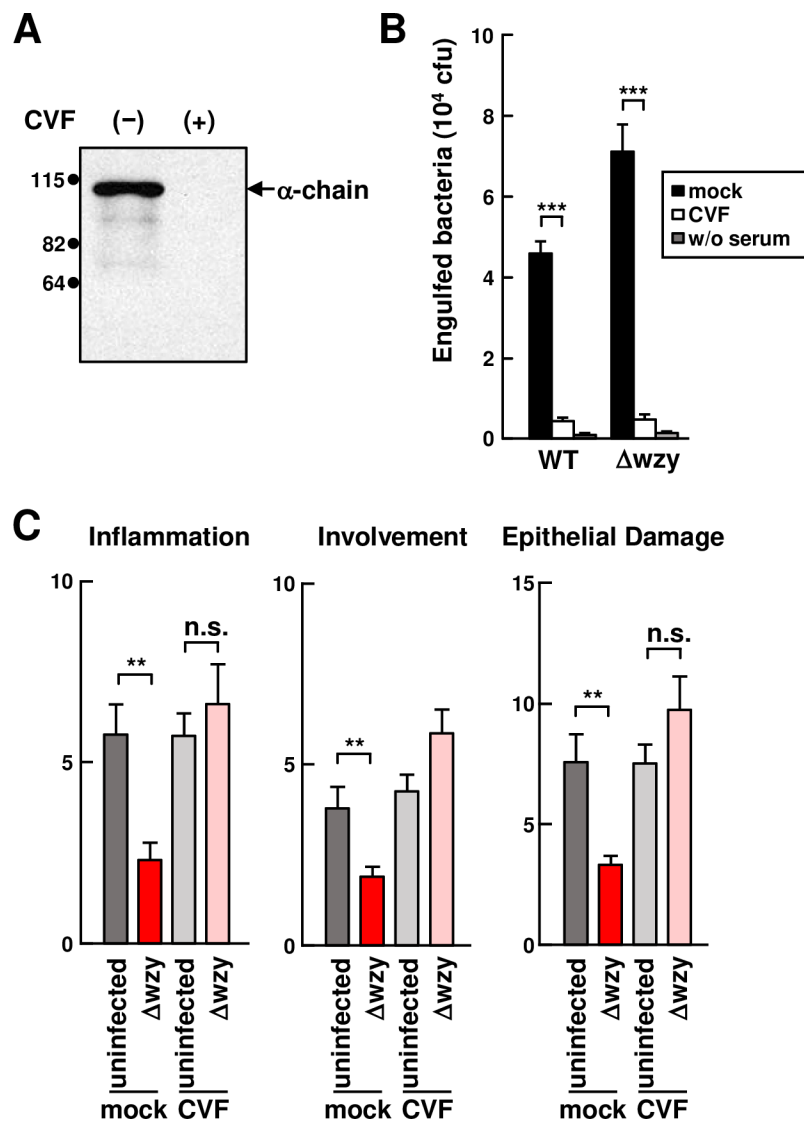

Supplement: S7 (10.1371/journal.ppat.1008928.s007) [file journal.ppat.1008928.s007]
